# Supplementary material for: Evolution of cichlid vision via trans-regulatory divergence
Source: PubMed Central journal article supplement (PMC3575402; doi:10.1186/1471-2148-12-251), 2012-12-26
Supplement: 1471-2148-12-251-S5.pdf [file 1471-2148-12-251-S5.pdf]

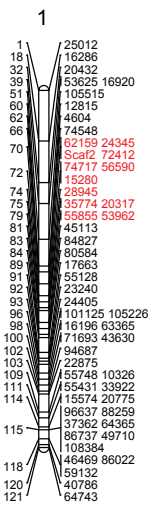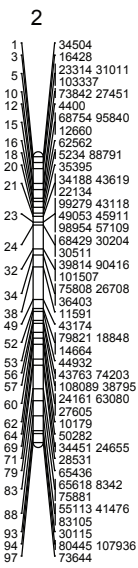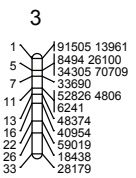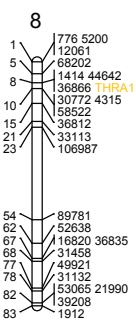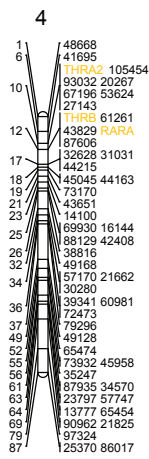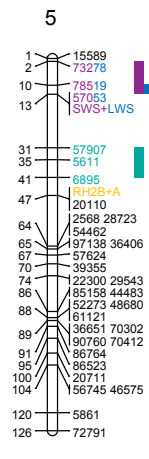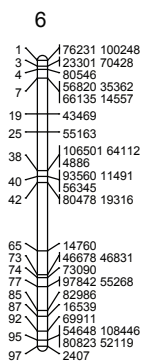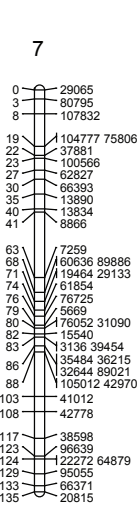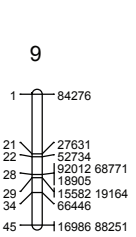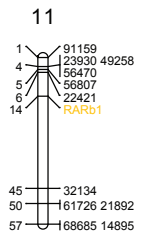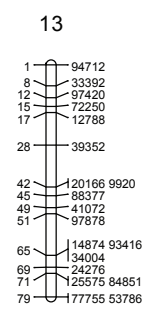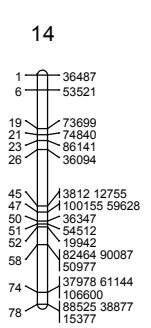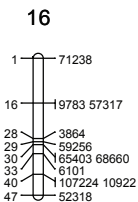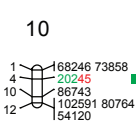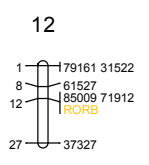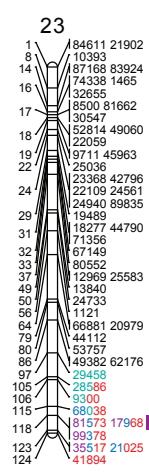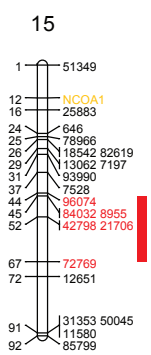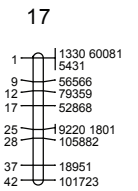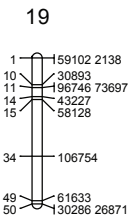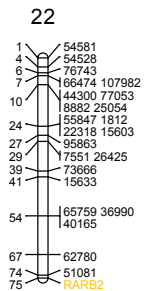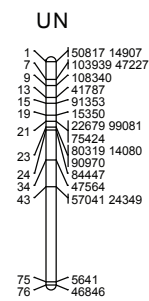

■ SWS2B  
■ SWS2A  
■ RH2A  
■ LWS  
■ candidate gene  
■ RH2B
