# Supplementary material for: Evolution of cichlid vision via trans-regulatory divergence
Source: PubMed Central journal article supplement (PMC3575402; doi:10.1186/1471-2148-12-251), 2012-12-26

LG 5

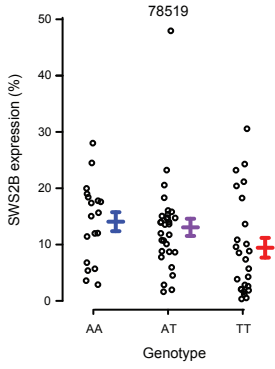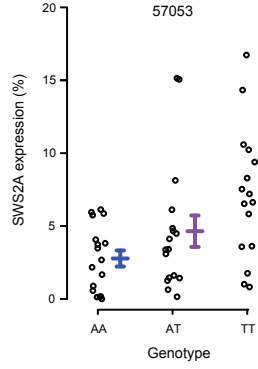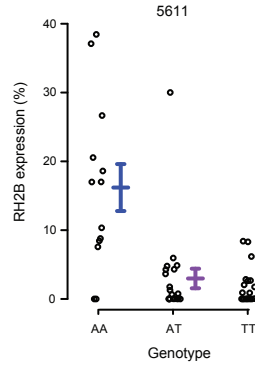

LG 1

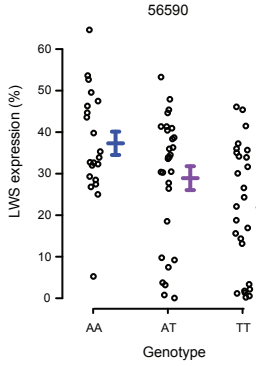

LG 10

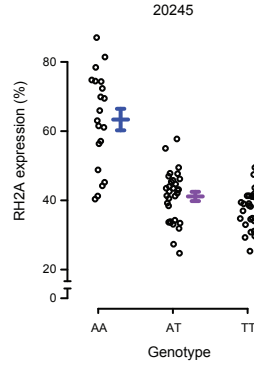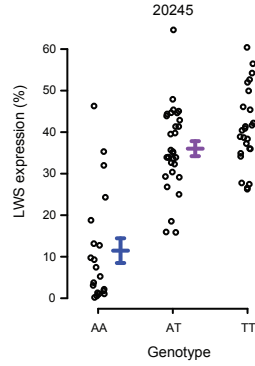

LG 15

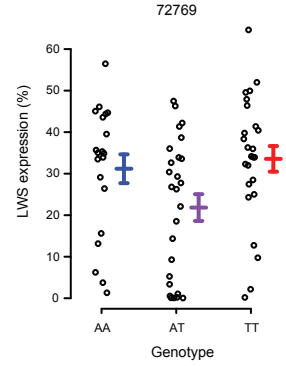

LG 23

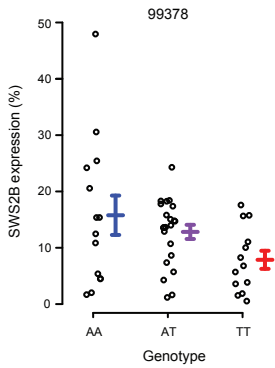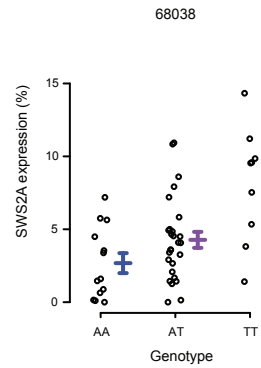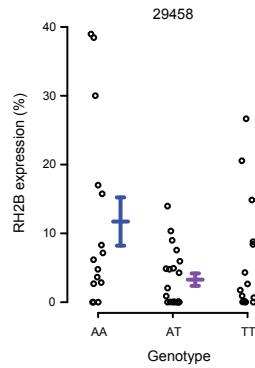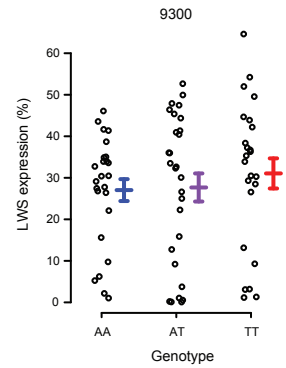

Supplement: 1471-2148-12-251-S7.pdf [file 1471-2148-12-251-S7.pdf]
